# Supplementary material for: Diversity, spatial distribution and activity of fungi in freshwater ecosystems
Source: PeerJ. 2019 Feb 21;7:e6247. doi: 10.7717/peerj.6247 (PMC6387782; doi:10.7717/peerj.6247)
Supplement: Table S2 [file peerj-07-6247-s005.xlsx]

## Sheet: Sheet1
										sequence sources
	Mangot et al	Short-term dynamics of diversity patterns : evidence of continual reassembly within lacustrine small eukaryotes	2013	Leman	0,2-5 µm	NSF573-NSR951		V4		http://datadryad.org/resource/doi:10.5061/dryad.gk04t
	Charvet et al.	Pyrosequencing analysis of the protist communities in a High Arctic meromictic lake: DNA preservation and change	2012	Lake A	0,2-3µm	E572F-E1009R		V4		http://www.ncbi.nlm.nih.gov/Traces/sra/sra.cgi?study=SRP014823
	Bachy et al.	Accuracy of protist diversity assessments: morphology compared with cloning and direct pyrosequencing of 18S rRNA genes and ITS regions using the conspicuous tintinnid ciliates as a case study	2013	coastal station of Villefranche et Ionian Sea offshore station two Mediterranean marine samples		Tin454-18SFw et Tin454-18SRev ciliates of the choreotrich taxon Tintinnida		V4		http://www.ncbi.nlm.nih.gov/sra/ERX145205
	Sophie Charvet	Effects of light and prey availability on Arctic freshwater protist communities examined by high-throughput DNA and RNA sequencing http://onlinelibrary.wiley.com/doi/10.1111/1574-6941.12324/full	2014	Lac Ward Hunt		E572F CY GCG GTA ATT CCA GCT C - E1009R CRA AGA YGA TYA GAT ACC RT - http://www.plosone.org/article/fetchSingleRepresentation.action?uri=info:doi/10.1371/journal.pone.0027492.s008		V4		SAMN02258453
	Estelle Kilias	A molecular survey of protist diversity through the central Arctic Ocean (http://link.springer.com/article/10.1007/s00300-014-1519-5/fulltext.html#Sec2)	2014	Arctic Ocean	3-0.4 µm	528F (5′-GCG GTA ATT CCA GCT CCA A-3′) and 1055R (5′-ACG GCC ATG CAC CAC CAC CCA T-3′)		V4		SRA064761
	Logares	Patterns of Rare and Abundant Marine Microbial Eukaryotes	2014	Marine	0.8-3µm			V9 et V4		4549916.3-4549968.3 (MG-RAST) http://metagenomics.anl.gov/metagenomics.cgi?page=MetagenomeProject&project=7526#jobs --> pas de fichier qualité
	Marianne Simon, Ludwig Jardillier, Philippe Deschamps, David Moreira, Gwendal Restoux, Paola Bertolino andPurificación López-García	Complex communities of small protists and unexpected occurrence of typical marine lineages in shallow freshwater systems		Etangs		EK-565F (5′-GCAGTTAAAAAGCTCGTAGT) and primer 18s-EUK- 1134-R- UNonMet (5′-TTTAAGTTTCAGCCTTGCG)				PRJNA259710 ftp://ftp-trace.ncbi.nlm.nih.gov/sra/sra-instant/reads/ByStudy/sra/SRP/SRP045/SRP045864/
	wang	High Genetic Diversity and Novelty in Eukaryotic Plankton Assemblages Inhabiting Saline Lakes in the Qaidam Basin http://www.plosone.org/article/info%3Adoi%2F10.1371%2Fjournal.pone.0112812#pone-0112812-g007		Saline lakes		A-528F (5′-gcctccctcgcgccatcag-GCGGTAATTCCAGCTC​CAA-3′)and B-1055R (5′-gccttgccagcccgctcag-ACGGCCATGCACCACC​ACCCAT-3′)		V4		SRA178606
	http://femsec.oxfordjournals.org/content/91/4/fiv010.long	Kammerlander et al. (2015)High diversity of protistan plankton communities in remote high mountain lakes in the European Alps and the Himalayan mountains		Lacs				V4 TAReukV4F and TAReukREV (5'-CCAGCA(G⁄C)C(C⁄T)GCGG-TAATTCC-3',S. cerevisiaeposition 565-584) andTAReukREV3 (-ACTTTCGTTCTTGAT(C⁄T)(A⁄G)

## Sheet: Sheet2
	Ecosystems	References	Sequence sources
		Freshwater environments used for taxonomic affiliation
	Lakes
	Pavin	Debroas et al. (2015)	https://doi.org/10.5061/dryad.5mv53
	Bourget	Debroas et al. (2015)	https://doi.org/10.5061/dryad.5mv53
	Leman	Mangot et al (2013)	http://datadryad.org/resource/doi:10.5061/dryad.gk04t
	LakeA	Charvet et al. (2012)	http://www.ncbi.nlm.nih.gov/Traces/sra/sra.cgi?study=SRP014823
	LakeWH	Charvet et al. (2014)	SAMN02258453
	Aydat, Anterne, Godivelle, Pavin, Bourget, Sep, Villerest	Lepere et al (2013) and Taib et al. (2013)	https://doi.org/10.5061/dryad.66hc3
	LaClaye	Simon et al. (2014) and Simon et al (2015)
	EtangVallees SaintRobert
	Garbard
			PRJNA259710 ftp://ftp-trace.ncbi.nlm.nih.gov/sra/sra-instant/reads/ByStudy/sra/SRP/SRP045/SRP045864/
	FAS3 FAS4	Kammerlander et al. (2015)	GenBank databases under accession number SRP032772
	HL5 HL15
	Aiguebelette		MG-RAST : 4703954.3 to 4703966.3
	Leman		MG-RAST : 4703954.3 to 4703966.3
	Vichy, Aydat, Eguzon, Pavin, Fades, Cournon, Grangent, RocheMoines		MG-RAST : 4703954.3 to 4703966.3
	Rivers and brooks
	RiverA and RiverB	Bricheux et al. (2013)	Pers. Com
	SaintAnneBrook	Simon et al. (2014) and Simon et al (2015)	PRJNA259710 ftp://ftp-trace.ncbi.nlm.nih.gov/sra/sra-instant/reads/ByStudy/sra/SRP/SRP045/SRP045864/
	Morcille		MG-RAST : 4703954.3 to 4703966.3
		External references: saline environments and/or DNA amplifying by specific primers
	Ngallou : hypersaline ponds	Roux et al. (2016)	in progress
	Blanes Naples Oslo Roscoff Varna	Logares et al. (2014)	4549916.3-4549968.3 (MG-RAST)
	Saline lakes	Wang et al. (2014)	SRA178606
	Arctic Ocean	Estelle Kilias et al. (2014)	SRA064761
	Coastal	Bachy et al. (2013)	http://www.ncbi.nlm.nih.gov/sra/ERX145205
	Table S2: Sources of the data used in this analysis
